# Supplementary material for: Anti-Tumorigenic and Anti-Metastatic Activity of the Sponge-Derived Marine Drugs Aeroplysinin-1 and Isofistularin-3 against Pheochromocytoma In Vitro
Source: PubMed Central journal article supplement (PMC5983303; doi:10.3390/md16050172), 2018-05-20
Supplement: marinedrugs-16-00172-s001.pdf [file marinedrugs-16-00172-s001.pdf]

## Supplementary material

### Anti-tumorigenic and anti-metastatic activity of the sponge-derived marine drugs Aeroplysinin-1 and Isofistularin-3 against pheochromocytoma *in vitro*

**Nicole Bechmann** <sup>1,\*</sup>, **Hermann Ehrlich** <sup>2</sup>, **Graeme Eisenhofer** <sup>1,3</sup>, **Andre Ehrlich** <sup>4</sup>, **Stephan Meschke** <sup>4</sup>, **Christian G. Ziegler** <sup>3</sup>, and **Stefan R. Bornstein** <sup>3,5</sup>

<sup>1</sup> Institute of Clinical Chemistry and Laboratory Medicine, University Hospital Carl Gustav Carus, Technical University Dresden, Fetscherstrasse 74, Dresden, Germany; Nicole.bechmann@uniklinikum-dresden.de; Graeme.eisenhofer@uniklinikum-dresden.de;

<sup>2</sup> Institute of Experimental Physics, TU Bergakademie Freiberg, Leipziger 23, 09599 Freiberg, Germany; Hermann.Ehrlich@physik.tu-freiberg.de

<sup>3</sup> Department of Medicine III, University Hospital Carl Gustav Carus, Technical University Dresden, Fetscherstrasse 74, 01307 Dresden, Germany; Stefan.bornstein@uniklinikum-dresden.de; Christian.ziegler@uniklinikum-dresden.de

<sup>4</sup> BromMarin GmbH, Wernerstraße 1, 09599 Freiberg; andre.ehrlich@brommarin.de; Stephan.meschke@brommarin.de

<sup>5</sup> Center for Regenerative Therapies Dresden, Technical University Dresden, Fetscherstrasse 105, 01307 Dresden, Germany

\* Correspondence: Nicole.bechmann@uniklinikum-dresden.de; Tel.: +49-351-458-19687

#### Contents

|                                                                           |   |
|---------------------------------------------------------------------------|---|
| 1. Experimental information's: qPCR .....                                 | 2 |
| 2. Influence of Aeroplysinin-1 and Isofistularin-3 on cell viability..... | 2 |
| 3. Impact of Isofistularin-3 on cells' pro-metastatic behavior .....      | 4 |

\*Corresponding author: Institute of Clinical Chemistry and Laboratory Medicine, Technical University Dresden, Fetscherstrasse 74, Dresden, Germany; Tel: +49 351 45819687; E-mail address: [Nicole.bechmann@uniklinikum-dresden.de](mailto:Nicole.bechmann@uniklinikum-dresden.de)

## 1. Experimental information's: qPCR

**Table 1:** Primer sequences and the targeted genes

| Gene                                     | Forward primer sequence   | Reverse primer sequence   | bp  |
|------------------------------------------|---------------------------|---------------------------|-----|
| mouse <i>β-actin</i>                     | GAGCACAGCTTCTTTGCAGCTCCTT | TGCCATGTTCAATGGGGTACTTCAG | 280 |
| mouse <i>Ripk</i>                        | GAAGACAGACCTAGACAGCGG     | CCAGTAGCTTCACCACTCGAC     | 182 |
| mouse <i>Bnip3</i>                       | TCCTGGGTAGAACTGCACTTC     | GCTGGGCATCCAACAGTATTT     | 103 |
| mouse <i>Ppia</i>                        | GAGCTGTTTGCAGACAAAGTTC    | CCCTGGCACATGAATCCTGG      | 125 |
| mouse <i>Ppid</i>                        | AACCCGCGAGTCTTCTTTGAC     | TAATTCGGTGGAAAGGGCATC     | 187 |
| mouse <i>Becn1</i>                       | ATGGAGGGGTCTAAGGCGTC      | ATGGAGGGGTCTAAGGCGTC      | 197 |
| mouse <i>Casp3</i>                       | TGGTGATGAAGGGGTCATTTATG   | TTCGGCTTTCCAGTCAGACTC     | 105 |
| mouse <i>Casp7</i>                       | GGACCGAGTGCCCACTTATC      | TCGCTTTGTGGAAGTTCTTGTT    | 89  |
| mouse <i>Itga1</i><br>(Integrin alpha 1) | CCTCCCTCGGATGTGAGTCA      | AAGTTCTCCCCGTATGGTAAGA    | 106 |
| mouse <i>Itga3</i><br>(Integrin alpha 3) | CCTCTTCGGCTACTCGGTC       | CCGGTTGGTATAGTCATCACCC    | 112 |
| mouse <i>Itga4</i><br>(integrin alpha 4) | GATGCTGTTGTTGTACTIONCGGG  | ACCACTGAGGCATTAGAGAGC     | 189 |
| mouse <i>Itgb1</i><br>(integrin beta 1)  | ATGCCAAATCTTGC GGAGAAT    | TTTGCTGCGATTGGTGACATT     | 209 |

## 2. Influence of Aeroplysinin-1 and Isofistularin-3 on cell viability

Additionally to the calculated EC<sub>50</sub> values in [figure 2](#) the dose-response up to a concentration of 50 µM of Aeroplysinin-1 or 100 µM Isofistularin-3 are shown in [Figure S1](#).

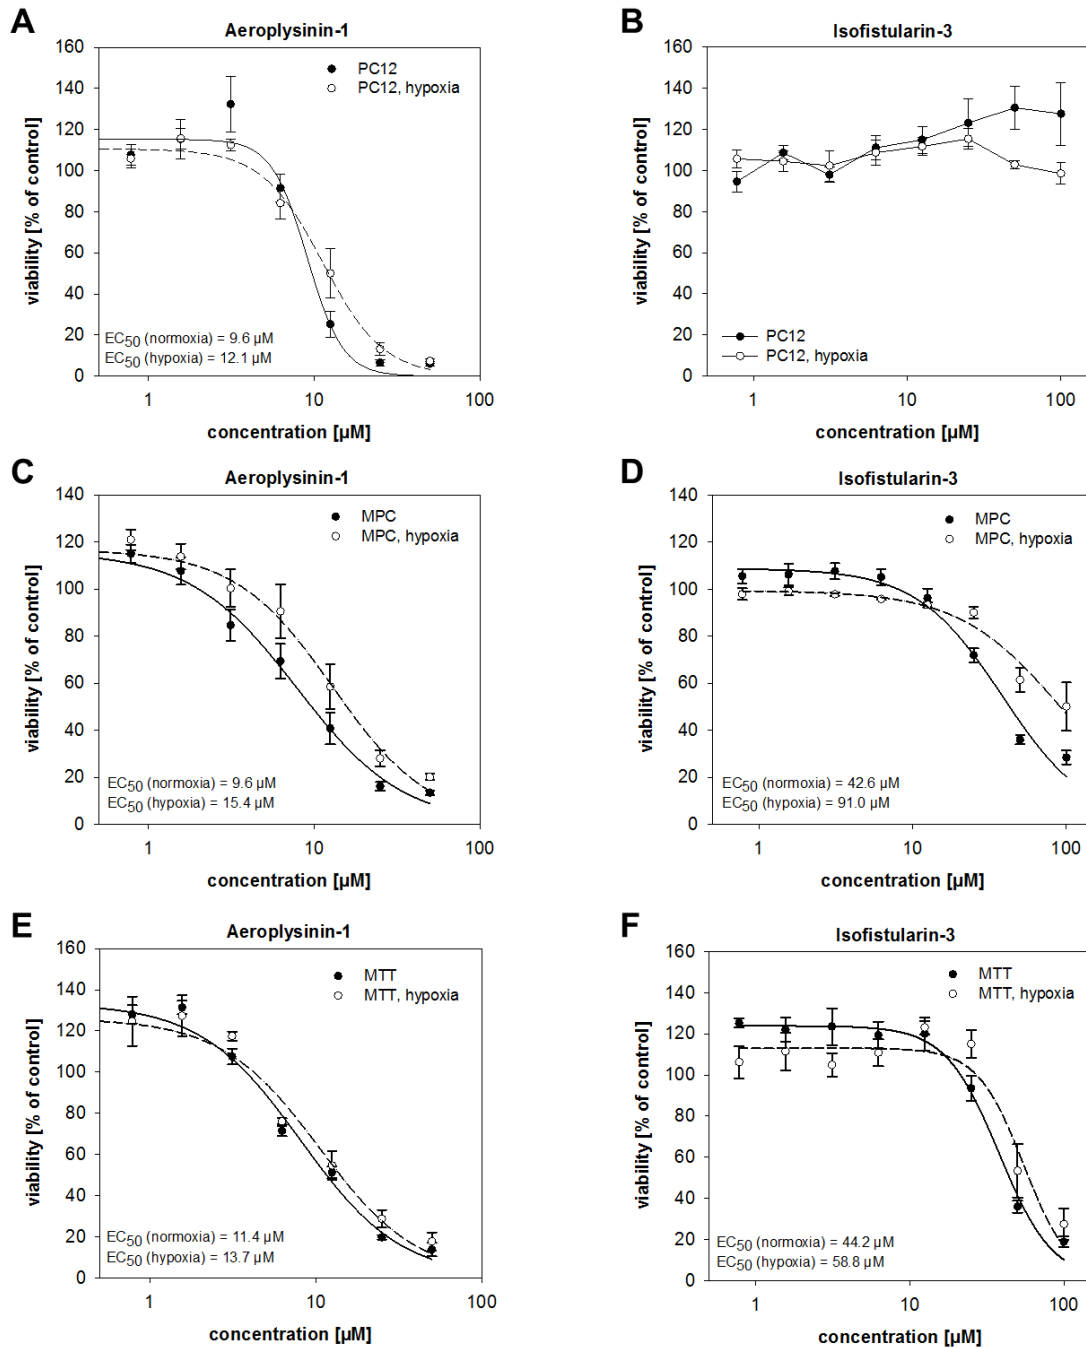

**Figure S1:** Dose-response curves of three different pheochromocytoma cell lines after treatment with Aeroplysinin-1 or Isofistularin-3 under normoxic and hypoxic conditions.

The effect of Aeroplysinin-1 (**A, C, E**) and Isofistularin-3 (**B, D, F**) on the viability of PC12 (**A-B**), MPC (**C-D**), and MTT (**E-F**) cells was analyzed by determining the dose-response curves after 24 h treatment using CellTiter 96® AQueous One Solution Cell Proliferation Assay. Half-maximal effective concentration (EC<sub>50</sub>) was calculated from dose-response curve by using dose-response fit model. Four independent experiments (n = 4). Average ± SEM.

### 3. Impact of Isofistularin-3 on cells' pro-metastatic behavior

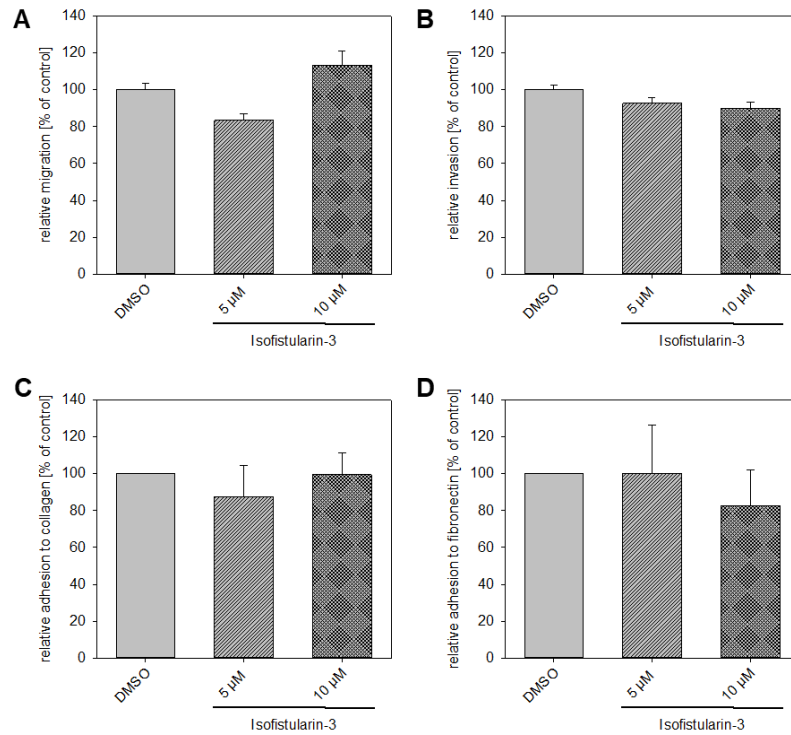

**Figure S2: Impact of Isofistularin-3 on the pro-metastatic behavior of MTT cells.**

Influence of different concentrations of Isofistularin-3 on (A) MTT cell migration and (B) invasion were analyzed in Boyden Chamber assays (with (B) or without (A) matrigel coating) after 24 h. Furthermore, the adhesion capacity of MTT cells to (C) collagen and (D) fibronectin after 24 h treatment with Aeropylsinin-1 was determined. Three to four independent experiments (n=12-18). Average±SEM; ANOVA and Bonferroni post hoc test comparison vs. control \*p<0.05.
